# Supplementary material for: Leaf status and environmental signals jointly regulate proline metabolism in winter oilseed rape
Source: PubMed Central journal article supplement (PMC7242077; doi:10.1093/jxb/erz538), 2019-12-06
Supplement: erz538_suppl_supplementary_materials.pdf [file erz538_suppl_supplementary_materials.pdf]

## Supplementary Material

**Supplementary fig. S1.** FW and DW per leaf area and FW/DW ratio of four leaf ranks having a different sink/source balance (L15, L11, L7, L3). Values are means  $\pm$  SD (n = 5 independent biological replicates). Different letters indicate that mean values are significantly different (p-value < 0.05) between the different leaf ranks.

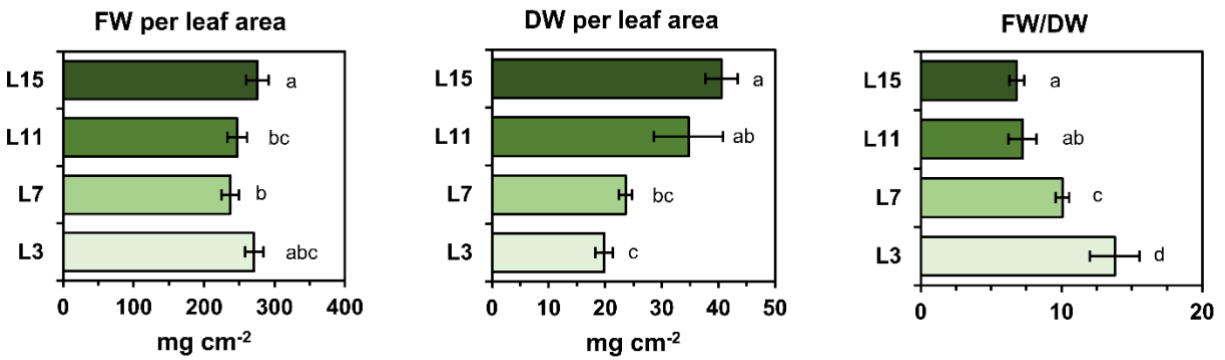

**Supplementary fig. S2.** Molecular phylogenetic analysis of the *Brassica napus* P5CS coding sequences. Sequence alignments were performed with MUSCLE, phylogenetic analysis with the maximum likelihood method and the nucleotide substitution model of Tamura-Nei, assuming uniform rates among sites (MEGAX software). The consensus tree from 1000 bootstrap replicates is shown with bootstrap values expressed between 0 and 100.

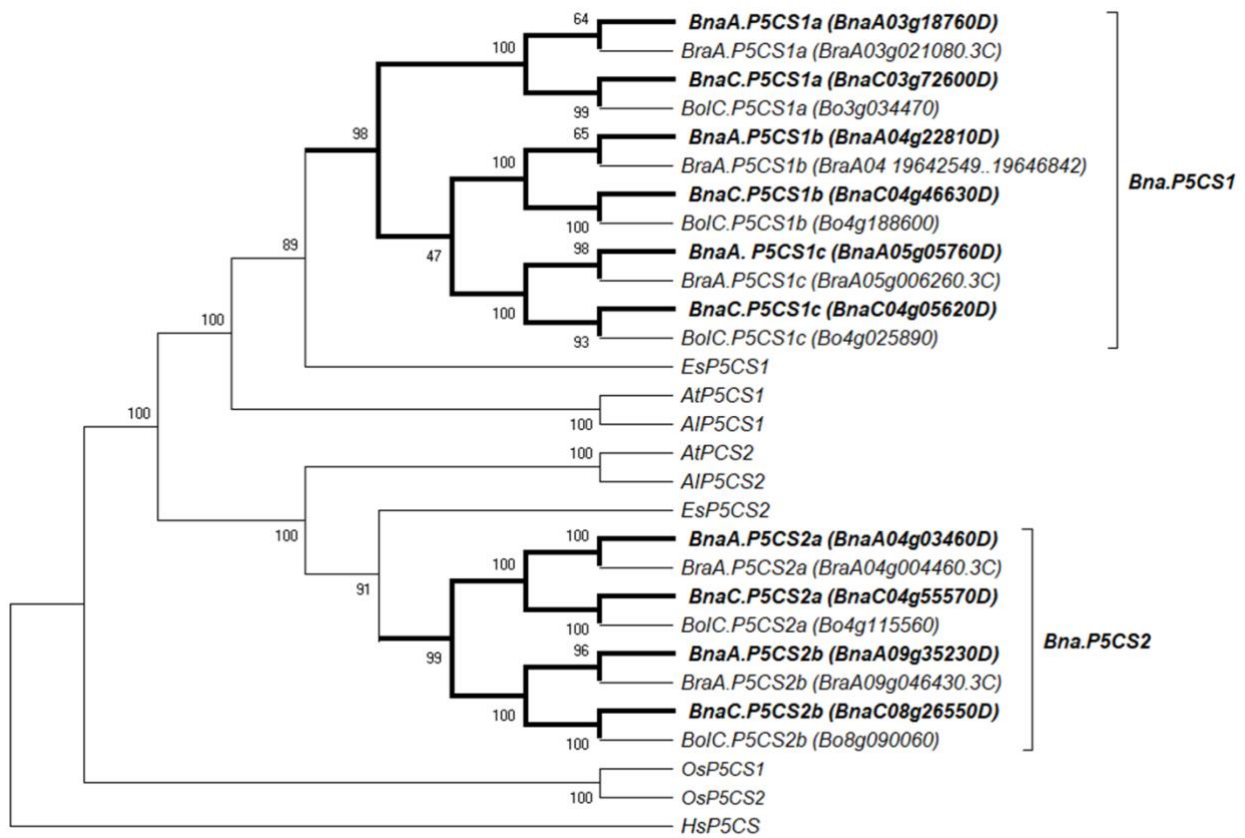

**Supplementary fig. S3.** Relative expression for each *BnaP5CS2* gene in four leaf ranks having a different sink/source balance (L15, L11, L7, L3) harvested either under dark or light conditions. Expression of each gene copy was normalized relatively to two reference genes *UBQ11* and *RibS3*. Values are the mean  $\pm$  SD of 5 independent biological replicates (nd = not detected). Different letters indicate that mean values are significantly different (p-value < 0.05) between the different leaf ranks. Different numbers indicate that mean values are significantly different (p-value < 0.05) between the dark and light conditions for each leaf rank.

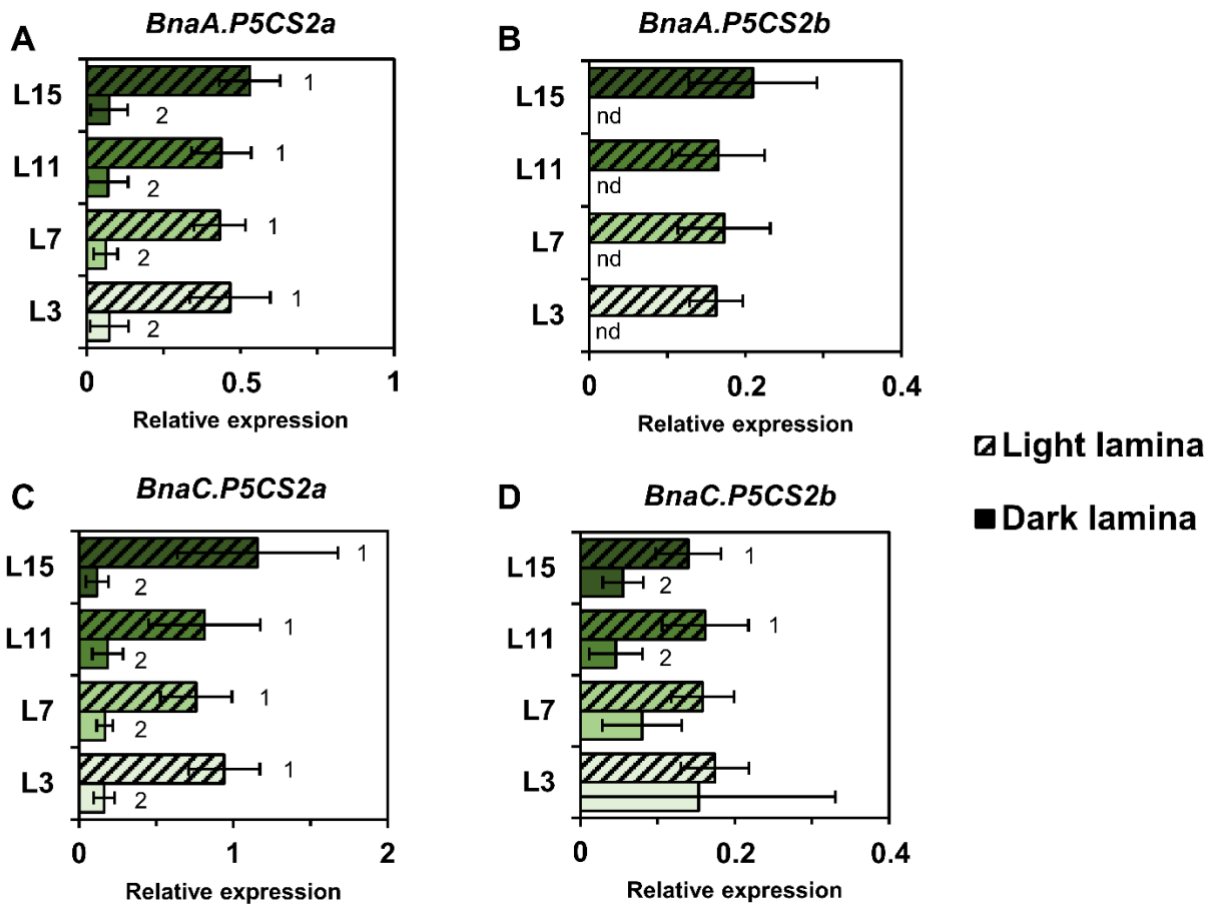

**Table S1.** Content of amino acids detected in the laminae of four leaf ranks having a different sink/source balance (L15, L11, L7, L3) sampled 3 hours after the beginning of the illumination period. Values are means  $\pm$  SD (n = 5 independent biological replicates), expressed in  $\mu\text{mol g}^{-1}\text{DW}$  (nd = not detected). Different letters indicate that mean values are significantly different (p-value < 0.05) between the different leaf ranks. *SMC* = *S-methylcysteine*; *SMCSO* = *S-methylcysteine sulfoxide*.

| Leaf ranks    | L15     |      | L11      |      | L7       |      | L3      |      |
|---------------|---------|------|----------|------|----------|------|---------|------|
|               | Mean    | SD   | Mean     | SD   | Mean     | SD   | Mean    | SD   |
| Alpha-Alanine | 1,46 a  | 0,24 | 1,06 ab  | 0,34 | 0,96 b   | 0,23 | 0,74 b  | 0,16 |
| Arginine      | 0,18 a  | 0,02 | 0,21 a   | 0,11 | 0,19 a   | 0,04 | 0,05 b  | 0,07 |
| Asparagine    | 0,91 a  | 0,32 | 0,44 b   | 0,29 | 0,53 ab  | 0,23 | 0,14 b  | 0,15 |
| Aspartate     | 7,77 a  | 1,24 | 3,80 bc  | 0,52 | 4,99 b   | 1,41 | 2,95 c  | 0,83 |
| Beta-Alanine  | 0,07 a  | 0,01 | 0,03 b   | 0,04 | nd       |      | nd      |      |
| Glutamate     | 14,52 a | 1,43 | 10,98 ac | 2,45 | 15,43 ab | 3,15 | 10,18 c | 1,12 |
| Glutamine     | 14,81 a | 5,65 | 4,47 b   | 3,02 | 4,65 b   | 2,02 | 2,20 b  | 0,67 |
| Glycine       | 0,23 a  | 0,03 | 0,38 ab  | 0,16 | 0,49 b   | 0,11 | 0,45 b  | 0,12 |
| Histidine     | 0,00    | 0,00 | 0,11     | 0,08 | nd       |      | nd      |      |
| Isoleucine    | 0,38 a  | 0,06 | 0,27 ab  | 0,09 | 0,26 b   | 0,03 | 0,23 b  | 0,07 |
| Leucine       | 0,10 a  | 0,02 | 0,25 b   | 0,10 | 0,28 b   | 0,05 | 0,29 b  | 0,10 |
| Lysine        | 0,14 a  | 0,01 | 0,22 ab  | 0,08 | 0,26 b   | 0,03 | 0,26 b  | 0,07 |
| Methionine    | 0,12 a  | 0,02 | 0,06 b   | 0,03 | 0,03 b   | 0,04 | nd      |      |
| SMC           | 0,11    | 0,04 | 0,13     | 0,05 | 0,06     | 0,08 | nd      |      |
| Phenylalanine | 0,19    | 0,03 | 0,23     | 0,04 | 0,24     | 0,03 | 0,28    | 0,12 |
| Proline       | 1,57 a  | 0,36 | 0,78 bc  | 0,12 | 0,91 b   | 0,18 | 0,52 c  | 0,06 |
| Serine        | 6,29 a  | 1,59 | 5,41 ab  | 2,51 | 7,05 a   | 3,04 | 2,14 b  | 1,56 |
| SMCSO         | 12,14 a | 2,57 | 7,74 b   | 0,92 | 10,75 ab | 1,71 | 8,56 b  | 1,30 |
| Threonine     | 1,71 ac | 0,40 | 1,68 ac  | 0,80 | 2,25 ab  | 0,67 | 1,15 bc | 0,22 |
| Tryptophan    | 0,00    | 0,00 | 0,10     | 0,03 | 0,04     | 0,04 | 0,06    | 0,09 |
| Tyrosine      | 0,06 a  | 0,04 | 0,15 b   | 0,05 | 0,18 b   | 0,04 | 0,15 b  | 0,05 |
| Valine        | 0,53    | 0,10 | 0,63     | 0,28 | 0,75     | 0,11 | 0,50    | 0,11 |

**Table S2.** List of primers used in this study for qPCR analysis and primers efficiency.

| Gene name                                     | forward                   | reverse                  | Primers efficiency |
|-----------------------------------------------|---------------------------|--------------------------|--------------------|
| <i>BnaA.P5CS1a</i><br>( <i>BnaA03g18760</i> ) | TCAACTTCTGGTGAATGATAGCAGT | TAAGGAGCTCTTCTGGTGCTGA   | 1,81               |
| <i>BnaA.P5CS1b</i><br>( <i>BnaA04g22810</i> ) | CGTTGAAGTTGTAGATGATGTG    | TTGTACTIONGCGTTGTGGAAT   | 1,93               |
| <i>BnaA.P5CS1c</i><br>( <i>BnaA05g05760</i> ) | GTGGGGATAAGCACAGGG        | CCATCCTCTCCTAGTCTCC      | 2,14               |
| <i>BnaA.P5CS2a</i><br>( <i>BnaA04g03460</i> ) | ATAAGCACAAGCAGAATACAC     | GAATCCGTTCTCCACTGCC      | 2,02               |
| <i>BnaA.P5CS2b</i><br>( <i>BnaA09g35230</i> ) | GATGCACATTTGTGGGCTAGA     | GCTTCTAGAGCGTTGGCTATATCT | 2,07               |
| <i>BnaC.P5CS1a</i><br>( <i>BnaC03g72600</i> ) | GAACAATGGAGTCACTTTGTAC    | AATGTGATCAATAGCAGCATAG   | 2,14               |
| <i>BnaC.P5CS1b</i><br>( <i>BnaC04g46630</i> ) | GATTTAGAGCAGAACGCTGA      | AGTACTCATGCTTGAACGAAG    | 2,01               |
| <i>BnaC.P5CS1c</i><br>( <i>BnaC04g05620</i> ) | CAGTGGGAGTGGAGGGAC        | CCACAAAGAGACTTCACACAG    | 2,07               |
| <i>BnaC.P5CS2a</i><br>( <i>BnaC04g55570</i> ) | TCACCAAGAACGTTAAGCGCA     | CTCAAATCCATCCGAGTTCAGT   | 1,99               |
| <i>BnaC.P5CS2b</i><br>( <i>BnaC08g26550</i> ) | TGCACATCTGTGGGCTCG        | CTCATTGCTTCAAGGGCTG      | 2,11               |
| <i>BnaA&amp;CProDH1.a</i>                     | ACGCACGATTGCTACAATA       | AAACTCTATCTTCCCGTTCTC    | 2,06               |
| <i>BnaA&amp;CProDH1.b</i>                     | AGCAGCAAAATCCTTACCT       | CTTCCACGAGAGTTTGAAT      | 2,06               |
| <i>BnaA&amp;C.ProDH1.c</i>                    | ATTGAAGCTGCCAAGTCC        | GTTCCCAACGAAGCAAGT       | 2,07               |
| <i>BnaA.ProDH2.a</i>                          | GTGAGGAGCGTGTATGAGTC      | ACAAATGGCTGTGATCTTAAC    | 1,94               |
| <i>BnaC.ProDH2.a</i>                          | CGTGAGGAGTGTGTATGAGTT     | GACAAATCGCTGTGATCTTAAT   | 1,97               |
| <i>BnaA&amp;C.SAG12-1&amp;2</i>               | GTTTTGTTTAGCCAAAGTCAAACA  | CGGCGGAAGATTGGCT         | 2,01               |
| <i>BnaCab</i>                                 | GGCAGCCCATGGTACGGATC      | CCTCCTCGCTGAAGATCTGT     | 2,11               |
| <i>BnaC.RibS3</i><br>( <i>BnaC04g13040D</i> ) | CCTGTCGCCCAGAAGAAG        | AGAGCCGCTGATAAGGTTTG     | 2,15               |
| <i>BnaC.UBQ11</i><br>( <i>BnaC04g09150D</i> ) | GTTGATCTTCGCTGGAAAAC      | CCATTAAAGACGGCTCGATG     | 2,10               |
